# Supplementary material for: Decisive role of electrostatic interaction in rheological evolution of graphene oxide under ultrasonic fragmentation
Source: Royal Society of Chemistry journal article supplement (doi:10.1039/d4na00328d), 2024-01-01
Supplement: d4na00328d1.pdf [file d4na00328d1.pdf]

## Supplementary Information for

# **Decisive role of electrostatic interaction on rheological evolution of graphene oxide under ultrasonic fragmentation**

*Dongpyo Hong<sup>a</sup>, Matlabjon Sattorov<sup>a</sup>, Ok Sung Jeon<sup>a</sup>, Se Hun Lee<sup>a</sup>, Gun-Sik Park<sup>b\*</sup>, Young Joon Yoo<sup>a\*</sup>, and Sang Yoon Park<sup>c\*</sup>*

<sup>a</sup>Advanced Institute of Convergence Technology, Seoul National University, Gyeonggi-do 16229, Republic of Korea

<sup>b</sup> Center for THz-Driven Biomedical Systems, Department of Physics and Astronomy, Institute of Applied Physics, College of Natural Sciences, Seoul National University, Seoul, 08826, Republic of Korea

<sup>c</sup>School of Electronic Engineering, Kyonggi University, Gyeonggi-do 16227, Republic of Korea

---

This supplementary information contains the following sections:

Figures S1-S4

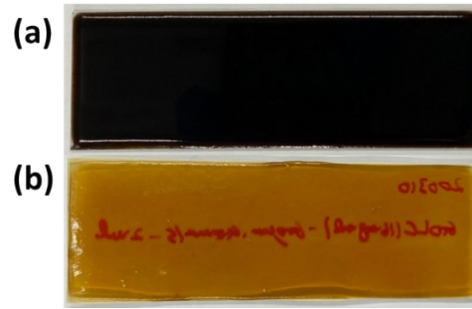

Fig. S1. Optical image of casted GO film with casting gap of  $600\mu\text{m}$ . (a) LOGO (b) HOGO.

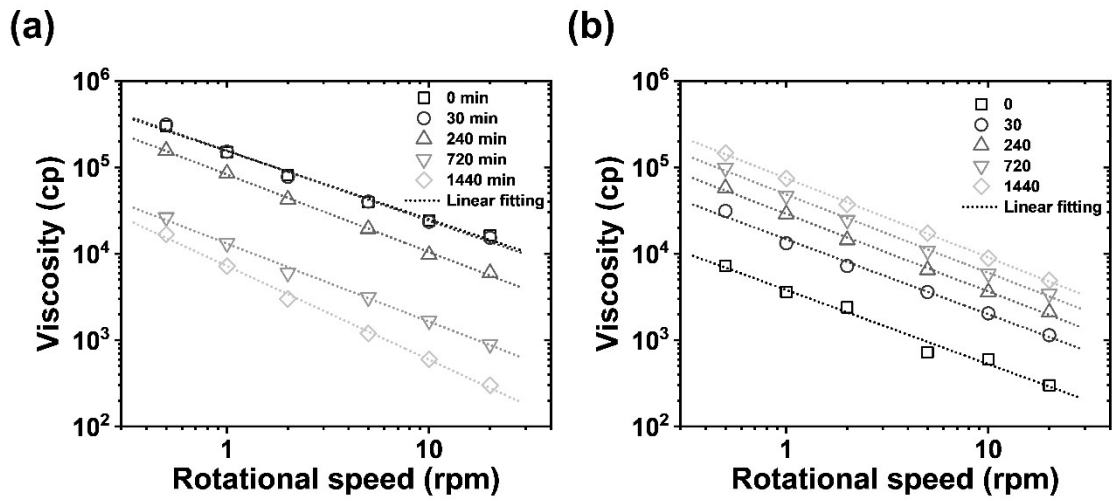

Fig. S2. Shear thinning effect of GO. (a) Viscosity of HOGO depending on rotational speed of spindle.  
 (b) Viscosity of LOGO depending on rotational speed of spindle after different sonication time

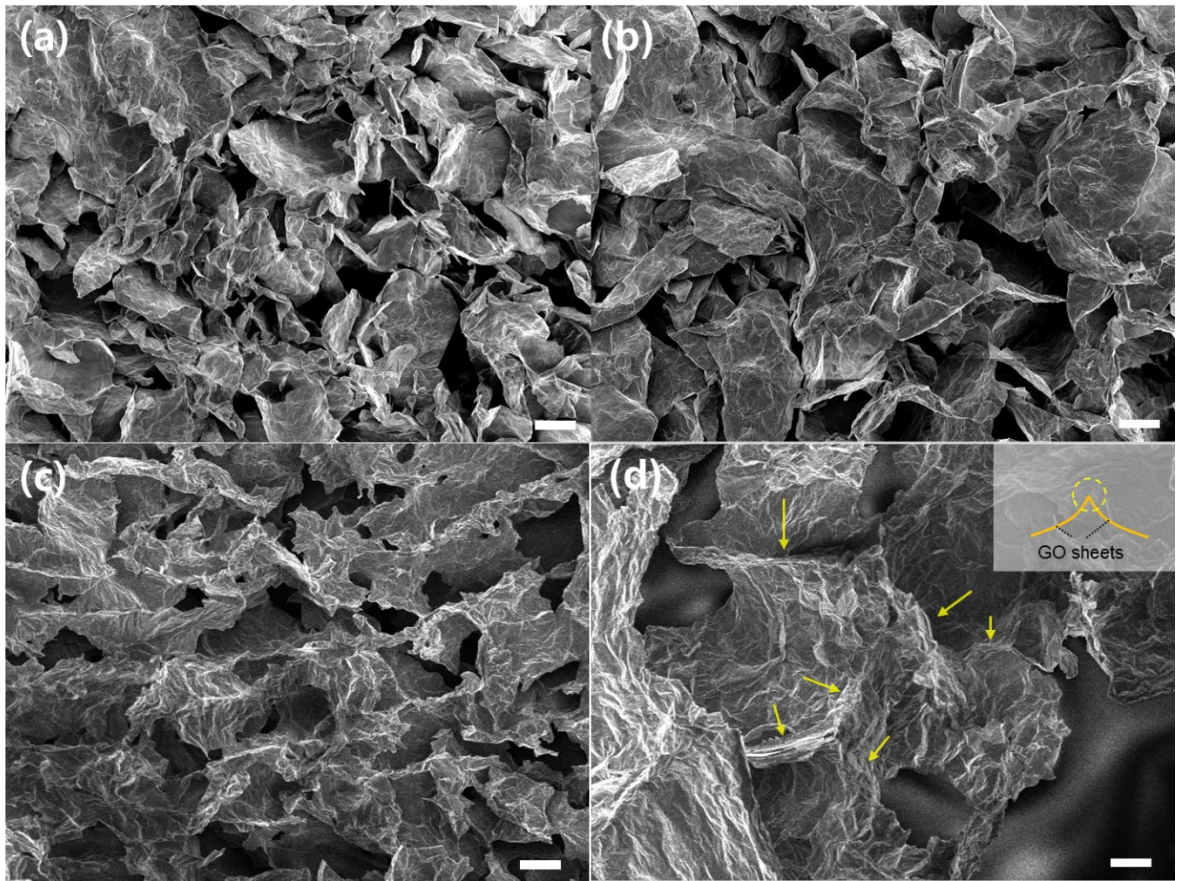

**Fig. S3.** Morphology of freeze-dried LOGO (a-b) before sonication and (c-d) after 120 min sonication measured by SEM. Scale bar:  $20\mu m$  for (a), (c) and  $10\mu m$  for (b), (d).

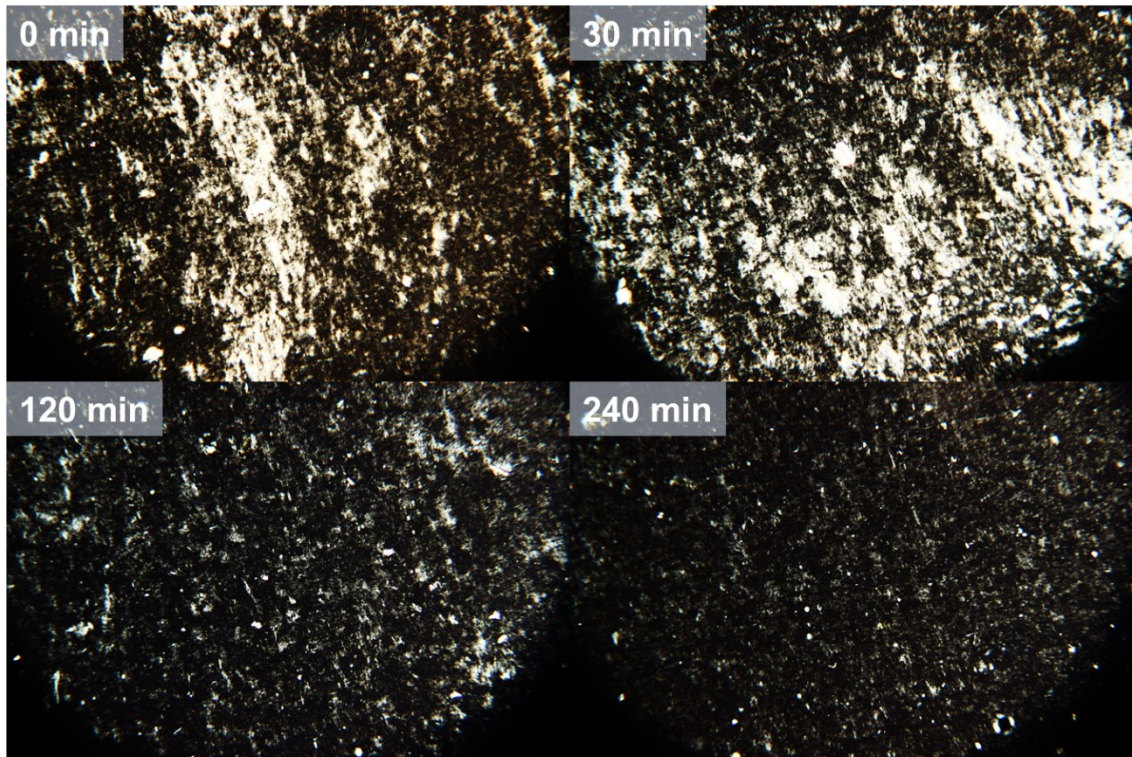

**Fig. S4.** Polarized optical microscope image of HOGO at different sonication time.
